# Supplementary material for: Supercurrent diode effect and finite-momentum superconductors
Source: PubMed Central journal article supplement — Proc Natl Acad Sci U S A. 2022 Apr 4;119(15):e2119548119. doi: 10.1073/pnas.2119548119 (PMC9169709; doi:10.1073/pnas.2119548119), 2022-04-04
Supplement: pnas.2119548119.sapp.pdf [file pnas.2119548119.sapp.pdf]

# Supplemental Information for “Supercurrent diode effect and finite momentum superconductivity”

Noah F. Q. Yuan<sup>1</sup>, Liang Fu<sup>2</sup>

1. Shenzhen JL Computational Science and Applied Research Institute, Shenzhen, 518109 China

2. Department of Physics, Massachusetts Institute of Technology, Cambridge, Massachusetts 02139, USA

## GINZBURG-LANDAU COEFFICIENT

We compute the the function  $\alpha_{\mathbf{q}}$  microscopically within mean field theory. From Eqs. (1,4) of the main text, the mean-field free energy density is  $f(\mathbf{q}, \Delta) = |\Delta|^2/V -$

$T \int d^2\mathbf{k} \text{tr} \log[1 + e^{-\mathcal{H}_{\mathbf{k}}(\mathbf{q}, \Delta)/T}]$ , where  $V$  is the attractive interaction strength and  $\text{tr}$  denotes trace in spin space.

By expansion of free energy density  $f(\mathbf{q}, \Delta)$  in terms of  $\Delta$  we have

$$\alpha = \log \frac{T}{T_c} + \frac{1}{N_0} \sum_{\lambda=\pm} \oint_{\text{FS}_{\lambda}} \frac{dk}{|\mathbf{v}^{\lambda}|} \left\{ \phi \left( \frac{Q + \lambda \mathcal{E}_+}{2\pi T} \right) \cos^2 \frac{\theta}{2} + \phi \left( \frac{Q + \lambda \mathcal{E}_-}{2\pi T} \right) \sin^2 \frac{\theta}{2} \right\}, \quad (\text{S1})$$

where  $\lambda = \pm$  denote contributions from inner ( $\lambda = +$ ) and outer ( $\lambda = -$ ) Fermi surfaces respectively,  $\phi(x) = \text{Re} \left[ \psi \left( \frac{1+ix}{2} \right) \right] - \psi \left( \frac{1}{2} \right)$ , and  $\psi$  is the digamma function.

Here,  $\mathbf{v}^{\lambda} = \partial_{\mathbf{k}} \xi_{\mathbf{k}}^{\lambda}$  is the electron velocity,  $Q = \mathbf{v}^{\lambda} \cdot \mathbf{q}$  is the depairing energy of finite momentum pairing,  $\mathcal{E}_{\pm} = |\mathbf{h}_{\pm}| \pm |\mathbf{h}_{-}|$  is the depairing energy of Zeeman splitting for inter- (+) or intra-pocket (-) Cooper pairs with  $\mathbf{h}_{\pm} = \mathbf{B} + \mathbf{g}_{\frac{1}{2}\mathbf{q} \pm \mathbf{k}}$ , and the angle  $\theta = \langle \mathbf{h}_{+}, \mathbf{h}_{-} \rangle$  between  $\mathbf{h}_{\pm}$  controls the ratio between inter- or intra-pocket Cooper pairs. Supercurrent affects  $\mathbf{q}$  and hence depairing energy  $Q$ , while magnetic field  $\mathbf{B}$  together with SOC affects depairing energies  $\mathcal{E}_{\pm}$  and angle  $\theta$ .

Near  $T_c$ , the temperature dependence of  $\alpha_{\mathbf{q}}$  can be captured by the first term  $\log(T/T_c)$ , and we can set  $T = T_c$  in the Fermi surface integrals. To evaluate the integral, notice that the field is weak  $B \ll B_P$ , one can expand the special function

$$\phi(x) = 2.10x^2 - 2.01x^4 + 2.00x^6 + O(x^8) \quad (\text{S2})$$

and then integrate order by order to obtain Eq. (14) of the main text.

## NONRECIPROCAL CRITICAL CURRENT AND POLARITY-DEPENDENT CRITICAL FIELD

For  $\alpha_{\mathbf{q}} = \bar{\alpha} + a\delta q_{\parallel}^2 - b\delta q_{\parallel}^3$ , we find the supercurrent is

$$\beta J_{\parallel}/e = |\alpha_{\mathbf{q}}| \partial_{\parallel} \alpha_{\mathbf{q}} = 2a\bar{\alpha}\delta q_{\parallel} - 3(\bar{\alpha}b)\delta q_{\parallel}^2 \quad (\text{S3})$$

$$+ 2a^2\delta q_{\parallel}^3 - 5(ab)\delta q_{\parallel}^4 + 3b^2\delta q_{\parallel}^5. \quad (\text{S4})$$

Notice that to the leading order of  $|\bar{\alpha}|^{\frac{1}{2}}$ , critical currents  $\pm J_c^{\pm}$  correspond to  $\delta q_{\parallel} = \mp \delta q_c$  respectively, where  $\delta q_c =$

$\sqrt{|\bar{\alpha}|/3a}$ . Then we have

$$\beta J_c^{\pm}/e = \frac{4|\bar{\alpha}|^{3/2}}{9a} \left( \sqrt{3a^3} \pm b\sqrt{|\bar{\alpha}|} \right) + O(|\bar{\alpha}|^{5/2}). \quad (\text{S5})$$

Since  $\bar{\alpha}, a, b$  are all functions of  $B$  and  $T$ , the equation above determines two phase boundaries parametrized by  $J, B$  and  $T$  as depicted in Fig. 1b of the main text. At weak field,  $a$  can be treated as a constant,  $b \propto B$  and  $\bar{\alpha} = t(1 - B^2/B_c^2)$  with reduced temperature  $t = (T - T_c)/T_c$  and critical field  $B_c \propto |t|^{1/2}$ . Then Eqs. (16-22) of the main text can be obtained.

Especially for Rashba superconductors at weak field, from Eq. (13) of the main text and (S5) we obtain

$$\frac{\beta \mathbf{J}}{eN_0} = \frac{4}{3\sqrt{3}} |\alpha_{\mathbf{q}_0}|^2 \xi \hat{\mathbf{n}} + \frac{4b_1 |\alpha_{\mathbf{q}_0}|}{9\xi^2} \mathbf{B} \times \hat{\mathbf{z}}, \quad (\text{S6})$$

where  $\hat{\mathbf{n}} = (\mathbf{q} - \mathbf{q}_0)/|\mathbf{q} - \mathbf{q}_0|$ , and under magnetic field

$$\alpha_{\mathbf{q}_0} = t \left( 1 - \frac{B^2}{B_c^2} \right), \quad \xi = C \frac{v_F}{\pi T_c} \left| t \left( 1 - \frac{B^2}{B_c^2} \right) \right|^{-\frac{1}{2}}. \quad (\text{S7})$$

Then we obtain the skewed phase boundary

$$\left( \frac{B}{B_c} \right)^2 + \left| \frac{\mathbf{J}}{J_c} - \gamma \frac{\mathbf{B} \times \hat{\mathbf{z}}}{B_c} \left( 1 - \frac{B^2}{B_c^2} \right)^2 \right|^{2/3} = 1, \quad (\text{S8})$$

with zero-field critical current

$$J_c = \frac{4eN_0^2 C}{3\sqrt{3}\beta} \frac{v_F}{\pi T_c} |t|^{3/2} \quad (\text{S9})$$

and the skewness parameter

$$\gamma = \frac{b_1 B_c |t|^{1/2}}{\sqrt{3} N_0} \left( \frac{\pi T_c}{v_F} \right)^3 = 0.64 \frac{\alpha_R}{v_F} \frac{B_c}{B_P} \sqrt{1 - \frac{T}{T_c}}. \quad (\text{S10})$$

To include higher order contributions, the supercurrent diode coefficient is

$$\delta = D(x), \quad x = \sqrt{\frac{|\alpha_{\mathbf{q}_0}|}{a^3}} b. \quad (\text{S11})$$

The special function is

$$D(x) = \frac{J(x) - J(-x)}{J(x) + J(-x)}, \quad (\text{S12})$$

where  $J(x) = [Q(x) - \frac{3}{2}xQ(x)][-1 + Q(x)^2 - xQ(x)^3]$ ,

$$Q(x) = \frac{1}{3x} - \frac{\sqrt{n}}{2x} - \frac{1}{2} \sqrt{\frac{4}{5\sqrt{n}} \left(1 - \frac{2}{27x^2}\right) - \frac{n}{x^2} + \frac{8}{15x^2}}$$

and  $n = \frac{2}{15} \left(z + 1/z + \frac{4}{3}\right)$ ,

$$z = \sqrt[3]{t + \sqrt{t^2 - 1}}, \quad t = \frac{135}{4}x^4 - 5x^2 + 1.$$

When  $|x| < \frac{2}{3\sqrt{3}}$ ,  $\frac{22}{27} < t < 1$  and  $z$  is complex. Denote  $t = \cos \theta$ , then  $z = e^{i\theta/3}$  and  $n = \frac{4}{15} \left(\cos \frac{\theta}{3} + \frac{2}{3}\right)$  is real. Since  $D(x) \approx x/\sqrt{3}$  we get the leading order contribution  $\delta = \sqrt{\frac{|\alpha_{\mathbf{q}_0}|}{3a^3}} b$ , namely

$$\delta = \delta_m \sqrt{1 - \frac{T}{T_c(B)}}, \quad \text{with } \delta_m = b \sqrt{\frac{a_0 T_c(B)}{3a^3}}. \quad (\text{S13})$$

The expansion of  $\alpha_{\mathbf{q}}$  near its minimum  $\mathbf{q}_0$  in general can be anisotropic

$$\alpha_{\mathbf{q}+\mathbf{q}_0} = \alpha_{\mathbf{q}_0} + a(1+\epsilon)q_x^2 + a(1-\epsilon)q_y^2 + 2a\eta q_x q_y - (b_1 q_x^3 + b_2 q_y^3 + b_3 q_x q_y^2 + b_4 q_x^2 q_y), \quad (\text{S14})$$

where  $a > 0$  and  $\epsilon^2 + \eta^2 < 1$  for stability. The supercurrent diode coefficient for supercurrent  $\mathbf{J} = J(\cos \theta, \sin \theta)$  can be worked out as

$$\delta = \sqrt{\frac{|\alpha_{\mathbf{q}_0}|}{3a^3}} \frac{\left(\frac{b_1+b_3}{2} + \frac{b_1-b_3}{2} \cos 2\theta\right) \cos \theta + \left(\frac{b_2+b_4}{2} - \frac{b_2-b_4}{2} \cos 2\theta\right) \sin \theta}{(1 + \epsilon \cos 2\theta + \eta \sin 2\theta)^{3/2}}. \quad (\text{S15})$$

## SUPERCURRENT DIODE EFFECT NEAR FFLO TRANSITION

When magnetic field is high, near a phase transition where two or more local minima of  $\alpha_{\mathbf{q}}$  compete, strong supercurrent diode effect can happen. As a concrete example, we consider the transition from BCS phase to FF phase near the upturning point  $(T_*, B_*)$  (red star in Fig. 3a of the main text), and adapt the following free energy density expanded up to quartic order in  $q$

$$\alpha_{\mathbf{q}} = c_0 + c_1 q^2 + c_2 q^4, \quad (\text{S16})$$

where  $c_1 = c(B_*^2 - B^2)$ , and  $c, c_2 > 0$ . When  $B < B_*$ ,  $c_1 > 0$  and the BCS phase with zero Cooper pair

momentum is the ground state. When  $B > B_*$ ,  $c_1 < 0$  and the ground state changes to the FF phase with Cooper pair momentum  $q_0 \equiv \sqrt{|c_1|/(2c_2)} \propto \sqrt{B^2 - B_*^2}$ . As a result, when one lowers the temperature, the in-plane critical field  $B_c(T)$  exhibits an upturn across the upturning point and hence the name.

To better understand the FFLO physics we need quartic order Ginzburg-Landau analysis. One can write the order parameter in Fourier form  $\Delta(\mathbf{r}) = \int d^2 \mathbf{q} \Delta_{\mathbf{q}} e^{i\mathbf{q} \cdot \mathbf{r}}$  and the free energy then reads

$$F \equiv \int d^2 \mathbf{r} f(\mathbf{r}) = \int d^2 \mathbf{q} \alpha_{\mathbf{q}} |\Delta_{\mathbf{q}}|^2 + \frac{1}{2} \int d^2 \mathbf{q} d^2 \mathbf{p} d^2 \mathbf{p}' \beta_{\mathbf{qpp}'} \Delta_{\mathbf{q}+\mathbf{p}} \Delta_{\mathbf{q}-\mathbf{p}} \Delta_{\mathbf{q}+\mathbf{p}'}^* \Delta_{\mathbf{q}-\mathbf{p}'}^*. \quad (\text{S17})$$

By analyzing the quartic coefficients  $\beta_{\mathbf{qpp}'}$  and the quadratic coefficients  $\alpha_{\mathbf{q}}$  one can then distinguish FF and LO phases [1, 2]. The quartic coefficient  $\beta_{\mathbf{qpp}'}$  is in general a function of momenta  $\mathbf{q}, \mathbf{p}$  and  $\mathbf{p}'$ , which to the leading order can be treated as momentum-independent

$\beta_{\mathbf{qpp}'} = \beta N_0$  if it does not change sign in the region where we are interested. One can work out  $\beta$  numerically

$$\beta = -\frac{T}{2N_0} \sum_{n \in \mathbb{Z}} \int d^2 \mathbf{k} \text{Tr} [G_e(\mathbf{k}, i\omega_n) (i\sigma_y) G_h(\mathbf{k}, i\omega_n) (i\sigma_y)^\dagger]^2 \quad (\text{S18})$$

by Mastubara Green's functions  $G_e = [i\omega_n - \mathcal{H}_{\mathbf{k}}]^{-1}$  and  $G_h = [i\omega_n + \mathcal{H}_{-\mathbf{k}}^*]^{-1}$  with  $\omega_n = (2n+1)\pi T$ .

In the absence of SOC, quartic coefficient  $\beta$  in Eq. (6) of the main text accidentally vanishes at the upturning point, making it a tricritical point where BCS ( $q=0$ ), FF (single- $\mathbf{q}$ ) and LO ( $\pm\mathbf{q}$ ) phases compete. With SOC considered in this work,  $\beta$  is finite as long as SOC is nonzero, and the supercurrent can be calculated by Eq. (11) of the main text. In the following we assume SOC is finite such that  $\beta \neq 0$  and expansion Eq. (S16) also applies.

As shown in Fig. S1, along a given direction, there are five zeros of supercurrent, one at metastable BCS phase  $q=0$ , one at ground state FF phase  $q_0$ , one at opposite FF phase  $-q_0$  and the other two at excited states where superconductivity vanishes  $\alpha_{\mathbf{q}} = 0$ . We hence expect four extremal points  $q_c^\pm$ ,  $-q_c^\pm$  of the supercurrent, and the resulting maximum and minimum are critical currents  $\pm J_c^\pm$  respectively.

Near the metastable BCS phase, the function  $\alpha_{\mathbf{q}} = \alpha_{-\mathbf{q}}$  is fully symmetric, and there seems no diode effect. However, around the true ground state FF phase  $\mathbf{q} = \mathbf{q}_0$  we have the expansion up to the nonzero third order

$$\alpha_{\mathbf{q}+\mathbf{q}_0} = c_0 - \frac{c_1^2}{4c_2} + 4c_2 \{(\mathbf{q} \cdot \mathbf{q}_0)^2 + (\mathbf{q} \cdot \mathbf{q}_0)q^2\}. \quad (\text{S19})$$

Since  $|\mathbf{q}_0| \propto \text{Re}\sqrt{B^2 - B_*^2}$ , near the upturning point the third order term is more important than the second order one. Consequently,  $\alpha_{\mathbf{q}}$  is highly asymmetric near  $\mathbf{q}_0$ , and  $J_c^\pm$  can be very different.

Moreover, as we approach the upturning point,  $J_c^- \rightarrow 0$  if superconducting phase stays in the  $q > 0$  branch. In this case, the superconductor near FF transition is a perfect diode: Supercurrent cannot pass antiparallel to the Cooper pair momentum. To be precise, the diode coefficient for supercurrent along direction  $\pm\hat{\mathbf{n}}$  is

$$\delta_{\hat{\mathbf{n}}} = (\hat{\mathbf{n}} \cdot \hat{\mathbf{q}}_0)F(x), \quad (\text{S20})$$

where  $x = c(B^2 - B_*^2)/\sqrt{c_0 c_2}$ . The special function is

$$F(a) = \frac{J_1(a) - J_2(a)}{J_1(a) + J_2(a)}, \quad (\text{S21})$$

where

$$J_1(a) = (ax - 2x^3)(x^4 - ax^2 - 1), \quad (\text{S22})$$

$$J_2(a) = -(ay - 2y^3)(y^4 - ay^2 - 1) \quad (\text{S23})$$

and ( $A = \sqrt{28 + 11a^2}$ ,  $\phi = \arccos \frac{20a^3 + 112a}{A^3}$ )

$$x = \sqrt{\frac{1}{7}A \cos\left(\frac{\phi}{3}\right) + \frac{5a}{14}}, \quad (\text{S24})$$

$$y = \sqrt{\frac{1}{7}A \cos\left(\frac{\phi - 2\pi}{3}\right) + \frac{5a}{14}}. \quad (\text{S25})$$

Notice that  $F(x) = 0$  for  $x < 0$ , and  $F(x) = 0.90x^{\frac{3}{2}} - 1$  for  $0 < x \ll 1$ . As a result, when  $B = B_*$  and  $T < T_*$ , we have  $x = 0$  and the FF superconductor is a perfect diode  $\delta = -1$ .

It is also possible that near the upturning point, when injected supercurrent switches its direction, superconducting phase changes from the  $q > 0$  branch to the  $q < 0$  branch. In that case there is no supercurrent diode effect. Similar discussions can also be found in Ref. [3].

## SUPERCURRENT DIODE EFFECT NEAR ZERO TEMPERATURE

Near the transition between FF superconductor and normal phase at low temperature  $T \rightarrow 0$ , we have

$$\phi\left(\frac{M}{2\pi T}\right) \sim -\log\frac{T}{T_c} + \log\left|\frac{M}{\Delta_0}\right| \quad (\text{S26})$$

where  $\Delta_0 = 4\pi e^{-\psi(1/2)}T_c$  is the pairing gap at zero temperature and zero field. Thus in the absence of SOC,

$$\alpha_{\mathbf{q}} = \frac{1}{2} \sum_{\lambda=\pm} \int_0^{2\pi} \frac{d\varphi}{2\pi} \left\{ \log\left|\frac{B + \lambda v_F q \cos\varphi}{\Delta_0}\right| \right\} \quad (\text{S27})$$

which can be worked out as  $\alpha_{\mathbf{q}} = \log(v_F q / \Delta_0)$  when  $v_F q > B$ , and in general can be written as the following piecewise function

$$\alpha_{\mathbf{q}} = \text{Re} \left[ \log\left(\frac{B + \sqrt{B^2 - v_F^2 q^2}}{\Delta_0}\right) \right]. \quad (\text{S28})$$

Minimizing  $\alpha_{\mathbf{q}}$  over  $\mathbf{q}$  yields a large Cooper pair momentum  $q_0 = B/v_F$  approaching  $1/\xi_0$  as  $B \rightarrow B_c$ . In this case, due to the non-analytic dependence of  $\mathbf{q}$ ,  $\alpha_{\mathbf{q}}$  is highly skewed with respect to  $\mathbf{q}_0$ : it rises steeply as  $q$  decreases from  $q_0$ . This leads to the maximum possible diode effect with  $\delta = (J_c^+ - J_c^-)/(J_c^+ + J_c^-) \sim -1$  near  $B_c$ , taking opposite sign as the one near tricritical point.

- 
- [1] Olga Dimitrova and M. V. Feigel'man, Phys. Rev. B **76**, 014522 (2007).
  - [2] Yuxuan Wang and Liang Fu, Phys. Rev. Lett. **119**, 187003 (2017).
  - [3] K. V. Samokhin and B. P. Truong, Phys. Rev. B **96**, 214501 (2017).

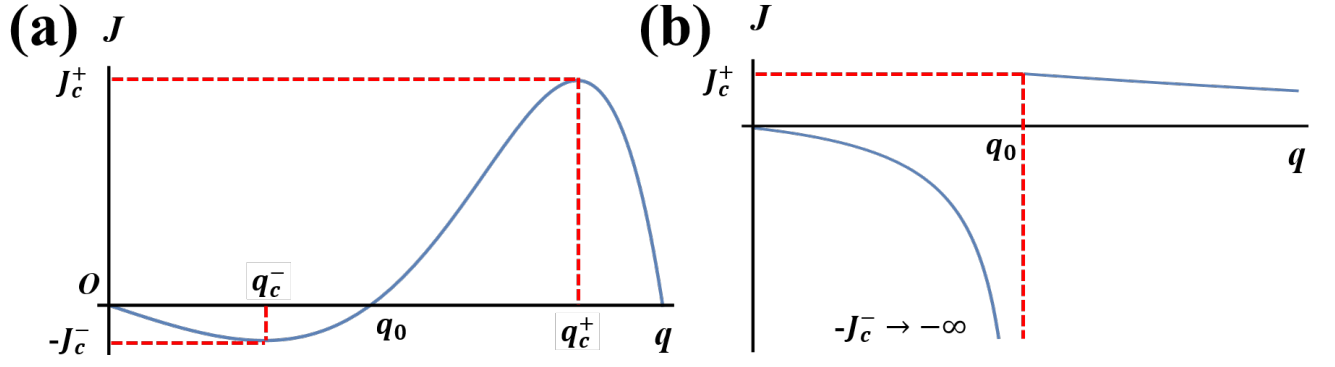

FIG. S1: (a) Near the FF transition, supercurrent  $J$  as a function of Cooper pair momentum  $q$  and  $J(-q) = -J(q)$ . Here  $q_0$  is the momentum of FF phase, and  $q_c^\pm$  are momenta for critical currents  $\pm J_c^\pm$  respectively in the positive branch  $q > 0$ . (b) At  $T = 0$ , supercurrent  $J$  as a function of Cooper pair momentum  $q$  and  $J(-q) = -J(q)$ . Here  $q_0$  is the momentum of FF phase, and  $q_c^\pm = q_0^\pm$  are momenta for critical currents  $\pm J_c^\pm$  respectively in the positive branch  $q > 0$ .
